# Supplementary material
Source: publisher figshare collection journal article supplement (https://acs.figshare.com/ndownloader/files/7670074)
Supplement: Supplementary file 1 [file 7670074]

## **Pyrene-Based Asymmetric Supramolecule: Kinetically Controlled Polymorphic Superstructures by Molecular Self-Assembly**

Minwook Park,<sup>†</sup> Won-Jin Yoon,<sup>†</sup> Dae-Yoon Kim,<sup>†</sup> Yu-Jin Choi,<sup>†</sup> Jahyeon Koo,<sup>†</sup> Seok-In Lim,<sup>†</sup> Dong-Gue Kang,<sup>†</sup> Chih-Hao Hsu<sup>‡</sup> and Kwang-Un Jeong<sup>†\*</sup>

### **1. Experimental details**

**1.1 Materials:** 1-bromooctane (99%, Aldrich), 4,4'-dihydroxybiphenyl (Biphenol, 97%, Aldrich), p-toluenesulfonyl chloride (Tosyl Chloride, 97%, Aldrich), triethylene glycol (Glycol, 99%, Aldrich), triethylamine (TEA, 99%, Aldrich), methyl 3,4,5-trihydroxybenzoate (98%, Aldrich), hydrochloric acid (35%, Showa), dimethyl 5-aminoisophthalate (98%, Aldrich), N,N'-Diisopropylcarbodiimide (DIPC, 99%, Aldrich), 4-(Dimethylamino) pyridinium 4-toluenesulfonate (DPTS, 99%). 1-pyrenemethylamine hydrochloride (95%, Aldrich), 1-hydroxy-7-azabenzotriazole (HOAt, 99%, GL Biochem(shanghai) Ltd), 1-(3-Dimethylaminopropyl)-3-ethylcarbodiimide (EDC, 98%, TCI), sodium chloride (99%, Aldrich), potassium carbonate (K<sub>2</sub>CO<sub>3</sub>, 99.5%, Showa), potassium iodide (KI, 99.5%, Showa), sodium hydroxide (NaOH, 93%, Showa) and anhydrous magnesium sulfate (MgSO<sub>4</sub>, 99.5%, Showa) were used as received. *N,N*-dimethylformamide (DMF), dimethylene chloride (MC), ethyl acetate (EA), methanol (MeOH), DI-water, and Chloroform (CHCl<sub>3</sub>) were purified before use.

## 1.2 Synthesis

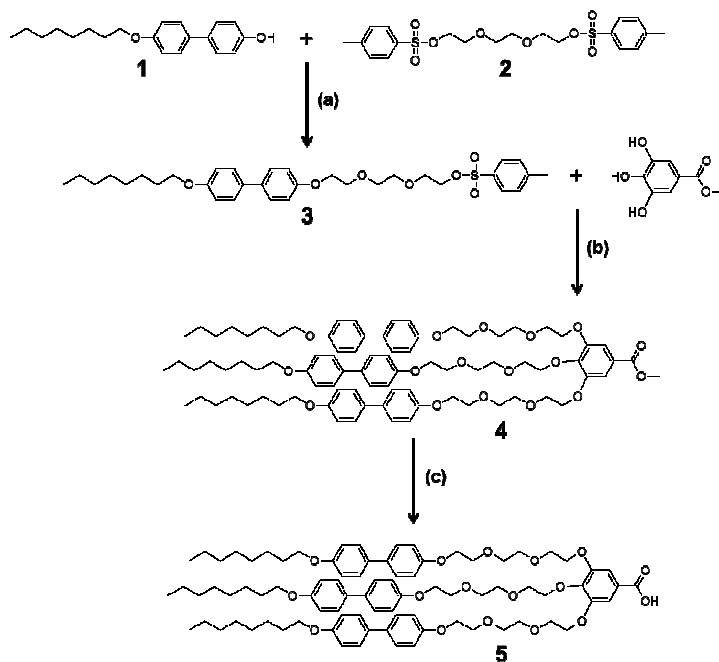

**Fig. S1** Schematic illustration; synthetic procedures of reagents, tri-mesogen benzoate derivatives, tri-mesogen benzoic acid derivatives and conditions: (a)  $\text{K}_2\text{CO}_3$ , DMF, 80 °C for 6 h. (b)  $\text{K}_2\text{CO}_3$ , DMF, 80 °C for 3 days under  $\text{N}_2$  atmosphere, (c) NaOH, THF/MeOH, 60 °C for 2 h.

4-(4'-octyloxy)hydroxybiphenyl (**1**) A solution of 1-bromooctane (11.7 g, 60.58 mmol), 4,4'-dihydroxybiphenyl (13.54 g, 72.71 mmol),  $\text{K}_2\text{CO}_3$  (8.37 g, 60.56 mmol), and KI (1.01 g, 6.08 mmol) in 80 mL of dried DMF was refluxed for 12 h. After reaction, the resulting mixture was poured in 1000 mL of DI-water and stirring for 8 h to obtain a precipitate. Using a glass filter, the precipitate was filtered and washed with water. The residue dissolved in EA and evaporation, the product was purified by recrystallization from EtOH, reddish product was white crystal (yield = 7.25 g, 40.1 %).  $^1\text{H}$  NMR (400 MHz,  $\text{CDCl}_3$ ) :  $\delta$  7.46-7.41 (dd, 4H, HF1,F2), 6.95-6.86 (dd, 4H, HE1,E2), 4.73 (s, 1H, HG), 4.00-3.96 (t, 2H, HD), 1.83-1.76 (m, 2H, Hc), 1.48-1.28 (m, 10H, HB1-,B5), 0.90-0.87 (t, 3H, HA).

Triethylene glycol ditosylate (**2**) A solution of p-toluenesulfonyl chloride (40.63 g, 213.11 mmol), triethylen glycol (16 g, 106.54 mmol), and TEA (29.72 mL, 213.08 mmol) in 150 mL of dried MC was stirring at room temperature for 8 h. The precipitation occurs during the reaction. After reaction, MC was poured into mixture, and washed with distilled water several times. The organic layer was dried over MgSO<sub>4</sub>. It was purified by column chromatography with silica gel using HEX:EA = 1:1. Resulting product is white solid. (yield = 41 g, 84 %). <sup>1</sup>H NMR (400 MHz, CDCl<sub>3</sub>) : δ 7.80-7.78 (d, 4H, HC), 7.35-7.33 (d, 4H, HB), 4.15-4.12 (t, 4H, HD), 3.66-3.64 (t, 4H, HE), 3.52 (s, 4H, HF), 2.44 (s, 6H, HA).

2-(2-(2-(4-(4'-octyloxy)biphenoxy)ethoxy)ethoxy)ethyl 4-methylbenzenesulfonate (**3**) A solution of 1 (4.88 g, 16.35 mmol), 2 (22.50 g, 49.06 mmol) and K<sub>2</sub>CO<sub>3</sub> in 150 mL of dried DMF was refluxed for 6 h. After reaction, solvent was removed by evaporation and remaining residue was dissolved in CHCl<sub>3</sub> and washed with distilled water several times. The organic layer was dried over MgSO<sub>4</sub>. It was purified by column chromatography with silica gel using HEX:EA = 1:1 and MC:EA = 12:1. Resulting product is white solid (yield = 4.2 g, 44 %). <sup>1</sup>H NMR (400 MHz, CDCl<sub>3</sub>) : δ 7.80-7.78 (d, 2H, HJ), 7.46-7.44 (dd, 4H, HF1,F2), 7.32-7.30 (d, 2H, HK), 6.96-6.93 (dd, 4H, HE1,E2), 4.17-4.12 (m, 4H, HG1,G2), 4.00-3.96 (t, 2H, HD), 3.85-3.82 (t, 2H, HH1), 3.71-3.60 (m, 6H, HI1,I2,H2), 2.42 (s, 3H, HL), 1.83-1.76 (m, 2H, HC), 1.50-1.29 (m, 10H, HB1-B5), 0.90-0.87 (t, 3H, HA).

Methyl 3,4,5-tri(2-(2-(2-(4-(4'-octyloxy)biphenoxy)ethoxy)ethoxy)ethoxy) benzoate (**4**) A solution of 3 (4.03 g, 6.89 mmol), methyl 3,4,5-trihydroxybenzoate (0.25 g, 1.36 mmol) and

$\text{K}_2\text{CO}_3$  in 40 mL of dried DMF was refluxed for three day. After reaction, solvent was removed by evaporation and remaining residue was dissolved in  $\text{CHCl}_3$  and washed with distilled water several times. The organic layer was dried over  $\text{MgSO}_4$ . It was purified by column chromatography with silica gel using  $\text{CHCl}_3:\text{EA} = 1:1$ . Resulting product is white solid (yield = 4.5 g, 46 %).  $^1\text{H}$  NMR (400 MHz,  $\text{CDCl}_3$ ) :  $\delta$  7.44-7.41 (m, 12H, HF1,F2), 7.29 (s, 2H, HJ), 6.94-6.90 (m, 12H, HE1,E2), 4.25-4.22 (t, 2H, HG2'), 4.20-4.17 (t, 4H, HG2), 4.13-4.09 (m, 6H, HG1), 3.98-3.95 (t, 6H, HD), 3.88-3.80m (m, 12H, HH1,H2), 3.86 (s, 3H, HK), 3.73-3.70 (m, 12H, HI1,I2), 1.82-1.75 (m, 6H, HC), 1.47-1.28 (m, 30H, HB1-B5), 0.90-0.87 (t, 9H, HA).

3,4,5-tri(2-(2-(2-(4-(4'-octyloxy)biphenoxy)ethoxy)ethoxy)ethoxy) benzoic acid (**5**) A solution of **4** (0.5 g, 0.352 mmol), in THF/MeOH (7.6 mL/ 5 mL) was added aqueous NaOH (ca. 10 M, 2.15 mL). The mixture was refluxed for 3 h, and then neutralized with an aqueous hydrochloric acid to obtain a precipitate. The precipitate was filtered off and washed with water. The crude product was purified by reprecipitation with  $\text{CHCl}_3$  and EtOH and dried under vacuum to afford **5** as a white waxy solid (yield = 0.47 g, 95 %).  $^1\text{H}$  NMR (400 MHz,  $\text{CDCl}_3$ ) :  $\delta$  7.44-7.41 (m, 12H, HF1,F2), 7.29 (s, 2H, HJ), 6.94-6.90 (m, 12H, HE1,E2), 4.25-4.22 (t, 2H, HG2'), 4.20-4.17 (t, 4H, HG2), 4.13-4.09 (m, 6H, HG1), 3.98-3.95 (t, 6H, HD), 3.88-3.80m (m, 12H, HH1,H2), 3.73-3.70 (m, 12H, HI1,I2), 1.82-1.75 (m, 6H, HC), 1.47-1.28 (m, 30H, HB1-B5), 0.90-0.87 (t, 9H, HA).

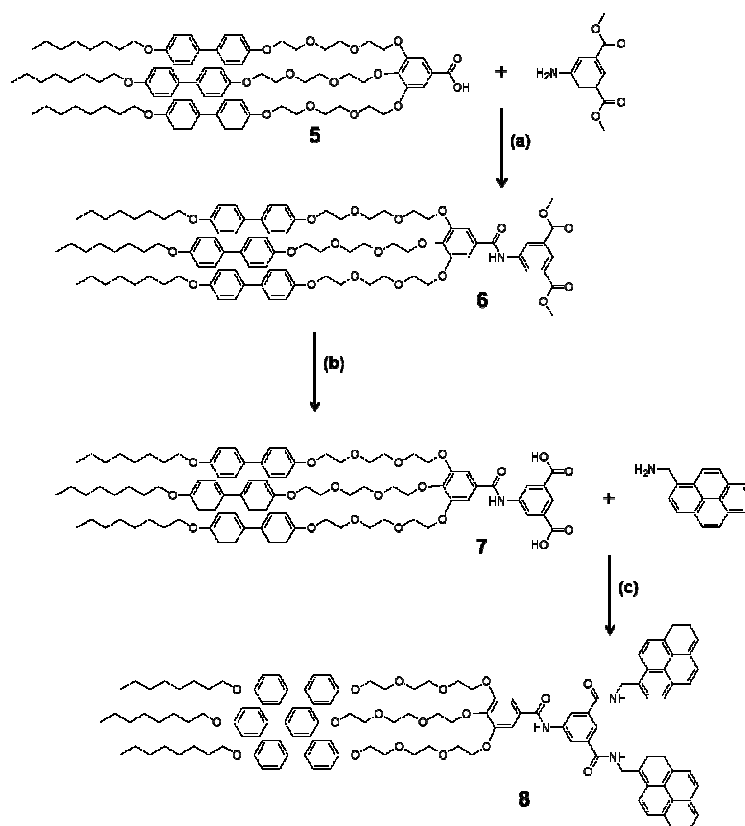

**Fig. S2** Schematic illustration; synthetic procedures of reagents, tri-mesogen benzamido isophthalate derivatives, tri-mesogen benzamido isophthalateamide derivatives and conditions: (a) DIPC, DPTS, Chloroform, 25 °C for 1 day. (b) NaOH, THF/MeOH, 60 °C for 2 h. (c) EDC, HOAt, DMF, 25 °C for 1 day.

Dimethyl 5-(3,4,5-tri(2-(2-(2-(4-(4'-octyloxy)biphenoxy)ethoxy)ethoxy)ethoxy)benzamido) isophthalate (**6**) A solution of **5** (0.53 g, 0.376 mmol), dimethyl 5-aminoisophthalate (0.15 g, 0.717 mmol), N,N'-Diisopropylcarbodiimide (0.23 g, 1.823 mmol) and 4-(Dimethylamino) pyridinium 4-toluenesulfonate (0.055 g, 0.257 mmol) in 10 mL of dried chloroform was stirring at room temperature for 1 day. After reaction, CHCl<sub>3</sub> was poured into mixture, and washed with distilled water several times. The organic layer was dried over MgSO<sub>4</sub>. It was purified by column chromatography with silica gel using MC:EA = 2:1. Resulting product is white solid (yield = 0.41 g, 68 %). <sup>1</sup>H NMR (400 MHz, CDCl<sub>3</sub>) : δ 8.52 (d, 2H, HK), 8.45 (s, 1H, HM), 8.42 (t, 1H, HL), 7.43-7.37 (m, 12H, HF1,F2), 7.25 (s, 2H, HJ), 6.97-6.82 (m, 12H,

HE1,E2), 4.25-4.20 (t, 2H, HG2'), 4.12-4.10 (t, 4H, HG2), 4.07-4.05 (m, 6H, HG1), 3.97-3.94 (t, 6H, HD), 3.90 (s, 6H, HN), 3.85-3.80m (m, 12H, HH1,H2), 3.76-3.71 (m, 12H, HI1,I2), 1.81-1.74 (m, 6H, HC), 1.47-1.20 (m, 30H, HB1-B5), 0.90-0.87 (t, 9H, HA).

5-(3,4,5-tri(2-(2-(2-(4-(4'-octyloxy)biphenoxy)ethoxy)ethoxy)ethoxy)benzamido)isophthalic acid (**7**) A solution of **6** (0.946 g, 0.591 mmol) in THF/MeOH (14.4 mL/ 10.7 mL) was added aqueous NaOH (ca. 10 M, 3.6 mL). The mixture was refluxed for 2.5 h, and then neutralized with an aqueous hydrochloric acid to obtain a precipitate. The precipitate was filtered off and washed with water. The crude product was purified by reprecipitation with CHCl<sub>3</sub> and EtOH and dried under vacuum to afford **7** as a white solid (yield = 0.891 g, 95.9 %). <sup>1</sup>H NMR (400 MHz, CDCl<sub>3</sub>) : δ 10.44 (s, 1H, HM), 8.64 (d, 2H, HK), 8.22 (t, 1H, HL), 7.45-7.42 (m, 12H, HF1,F2), 7.40 (s, 2H, HJ), 6.93-6.98 (m, 12H, HE1,E2), 4.23-4.20 (t, 2H, HG2'), 4.15-4.12 (t, 4H, HG2), 4.07-4.05 (m, 6H, HG1), 3.95-3.92 (t, 6H, HD), 3.74-3.69 (m, 12H, HH1,H2), 3.63-3.58 (m, 12H, HI1,I2), 1.72-1.66 (m, 6H, HC), 1.44-1.23 (m, 30H, HB1-B5), 0.87-0.84 (t, 9H, HA).

N1,N3-bis(pyren-1-ylmethyl)-5-(3,4,5-tri(2-(2-(2-(4-(4'-octyloxy)biphenoxy)ethoxy)ethoxy)ethoxy)benzamido)isophthalamide (**8**) A solution of **7** (0.9 g, 0.573 mmol), 1-pyrenemethylamine hydrochloride (0.33 g, 1.23 mmol), 1-hydroxy-7-azabenzotriazole (0.164 g, 1.2 mmol) and 1-(3-dimethylaminopropyl)-3-ethylcarbodiimide (0.23 g, 1.2 mmol) in 10 mL of dried DMF was stirring at room temperature for 1 day. After reaction, solvent was removed by evaporation and remaining residue was dissolved in CHCl<sub>3</sub> and washed with saturated sodium chloride solution to remove remaining salts several times. The organic layer was dried over MgSO<sub>4</sub>. It was purified by column chromatography with

silica gel using THF:MC:HEX = 1:1:1. Resulting product is white solid (yield = 0.45 g, 39 %).  $^1\text{H}$  NMR (400 MHz,  $\text{CDCl}_3$ ) :  $\delta$  10.25 (s, 1H, HM), 9.16 (s, 2H, HN), 8.50-8.48 (d, 2H, HP1), 8.45 (d, 2H, HK), 8.27-8.25 (d, 4H, HP7,P3), 8.23-8.19 (m, 4H, HP2,P9), 8.17 (t, 1H, HL), 8.12 (s, 4H, HP4,P8), 8.09-8.03 (m, 4H, HP5,P6), 7.45-7.41 (m, 12H, HF1,F2), 7.34 (s, 2H, HJ), 6.92-6.87 (m, 12H, HE1,E2), 5.23 (d, 4H, HO), 4.18-4.16 (t, 2H, HG2'), 4.13-4.11 (t, 4H, HG2), 4.06-4.04 (m, 6H, HG1), 3.93-3.88 (t, 6H, HD), 3.77-3.70 (m, 12H, HH1,H2), 3.61-3.57 (m, 12H, HI1,I2), 1.65-1.63 (m, 6H, HC), 1.40-1.19 (m, 30H, HB1-B5), 0.84-0.82 (t, 9H, HA).





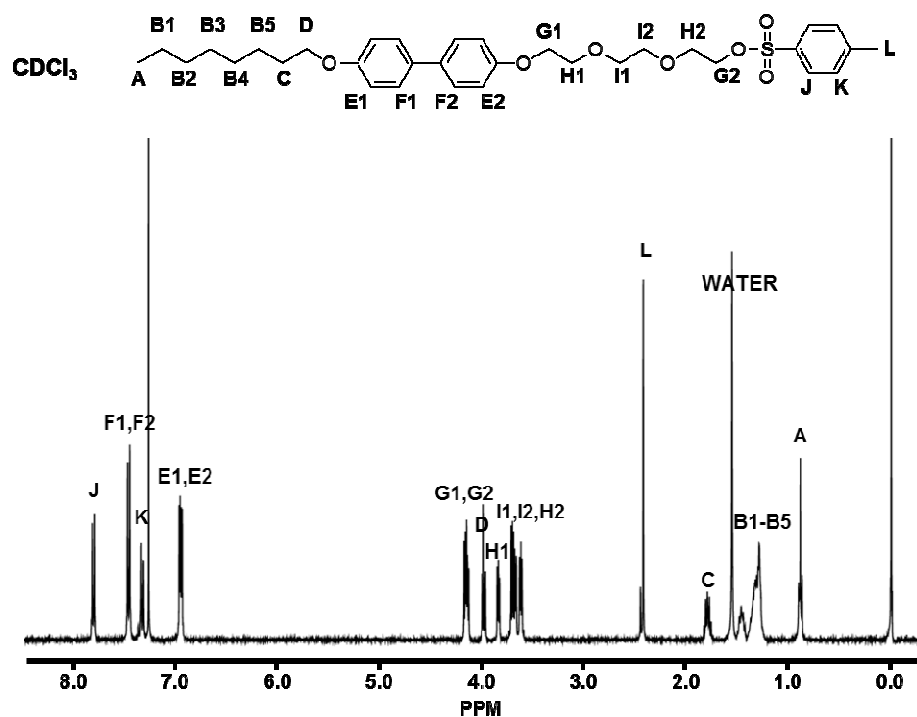

Fig. S5 <sup>1</sup>H NMR spectrum of compound 3

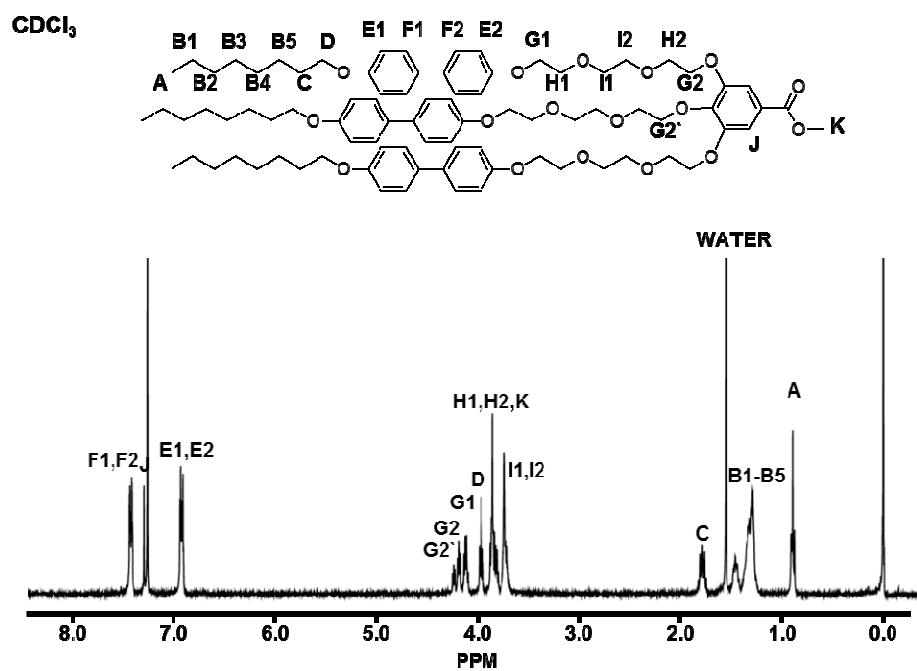

Fig. S6 <sup>1</sup>H NMR spectrum of compound 4

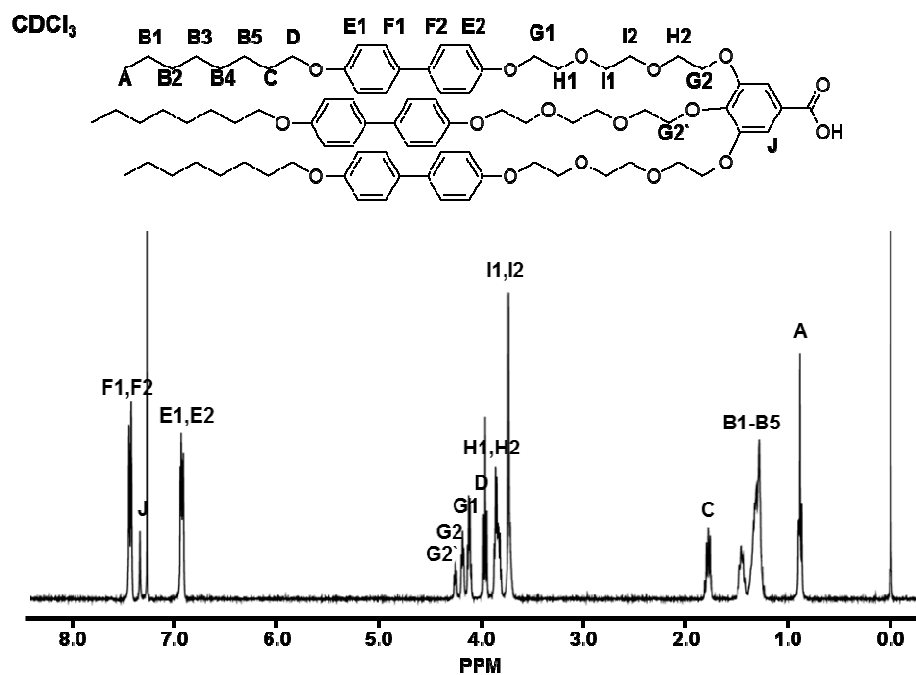

Fig. S7 <sup>1</sup>H NMR spectrum of compound 5

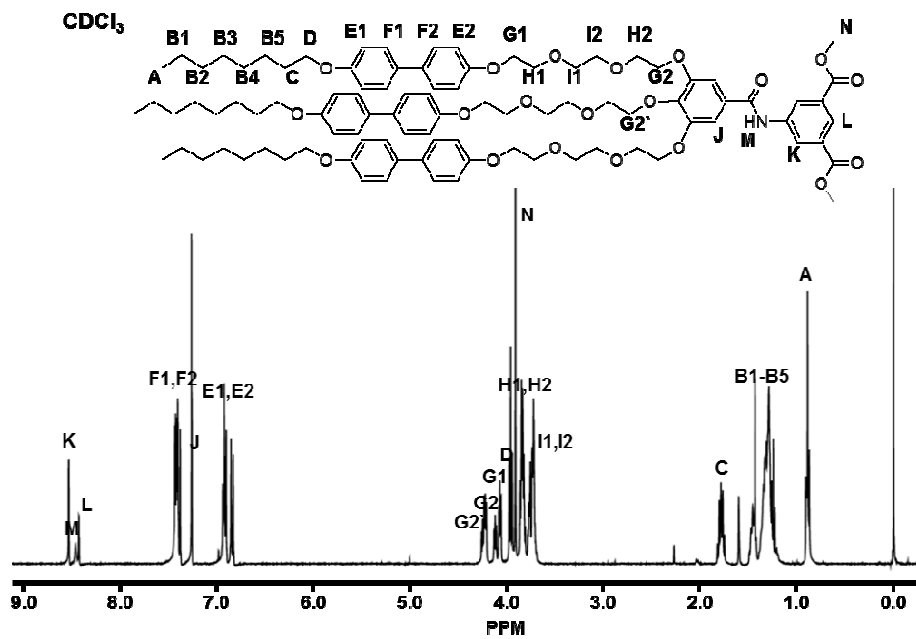

Fig. S8 <sup>1</sup>H NMR spectrum of compound 6

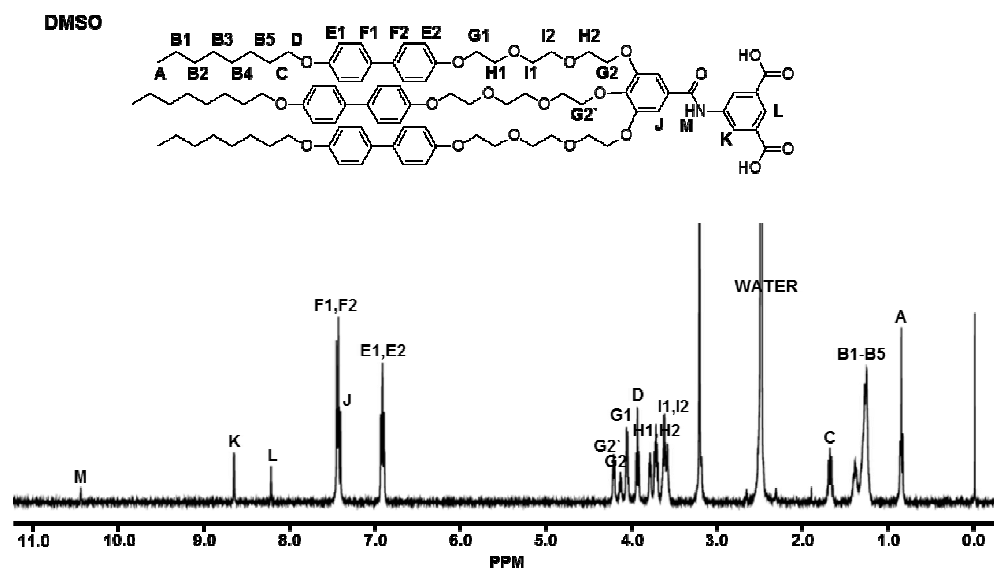

Fig. S9  $^1\text{H}$  NMR spectrum of compound 7

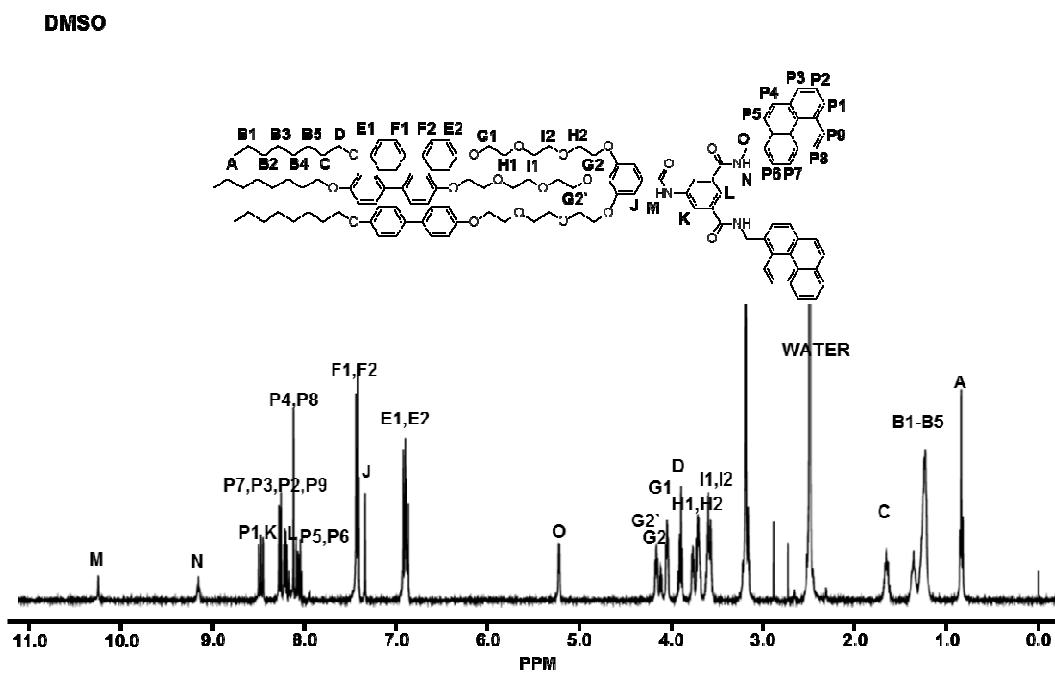

Fig. S10  $^1\text{H}$  NMR spectrum of compound 8

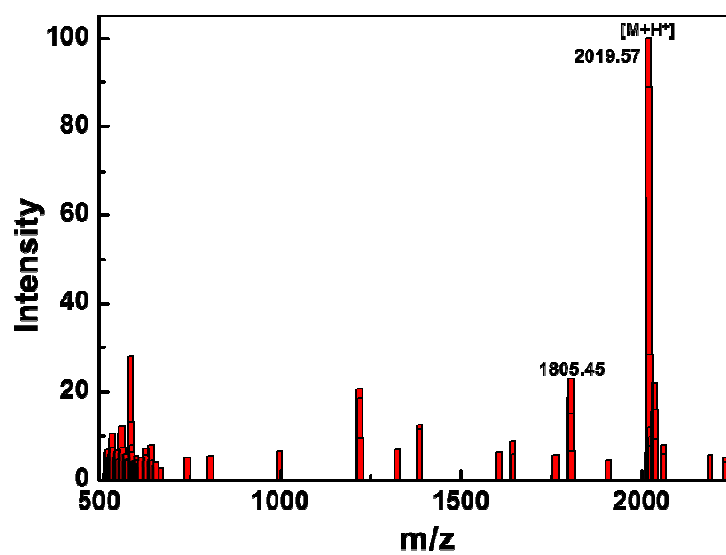

Fig. S11 MALDI-ToF MS spectrum of Py3M.

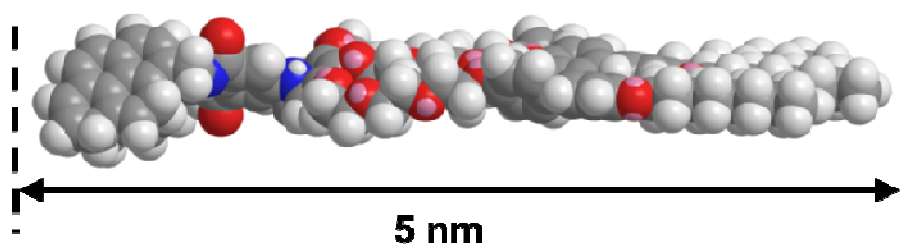

Fig. S12 Computer energy-minimized geometric dimensions of Py3M in the side directions.

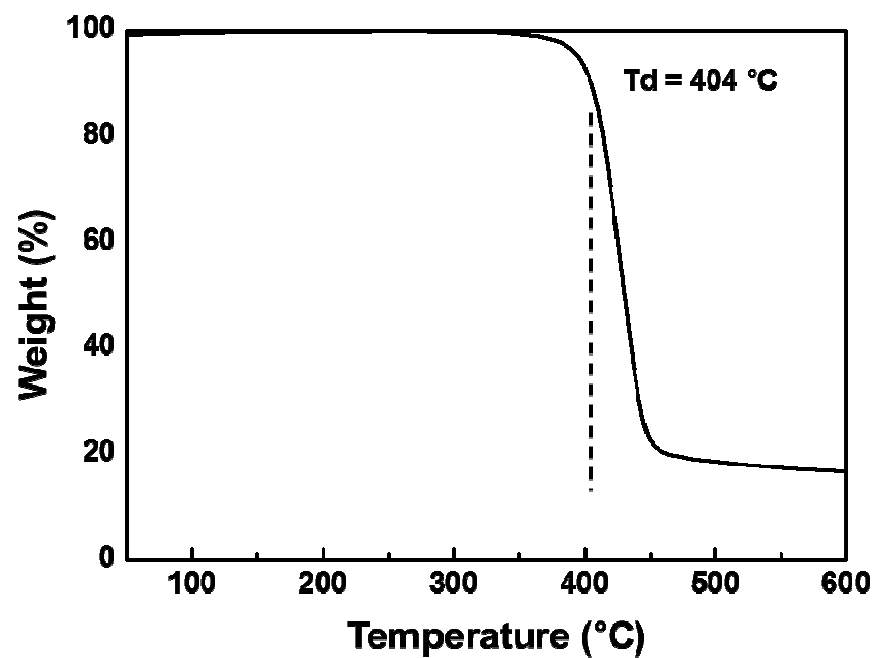

Fig. S13 TGA of Py3M. The 5 wt% weight loss is detected at 404 °C.

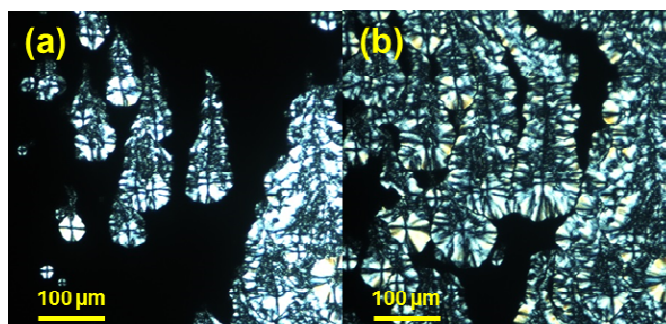

Fig. S14 POM images of Py3M by cooling from 220 °C at -5 °C/min and holding at 178 °C for various times; after (a) 0.5 h and (b) 2 h.

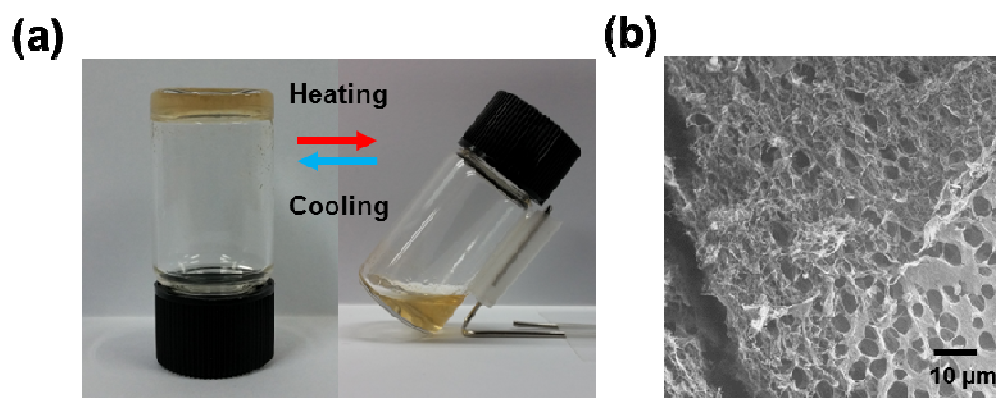

**Fig. S15** (a) Photograph of sol-gel transition and (b) SEM image of Py3M multi-network.

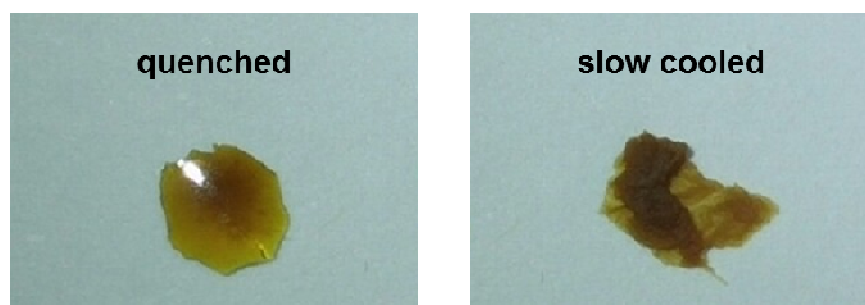

**Fig. S16** Photographs of Py3M solids fabricated from two different cooling processes.

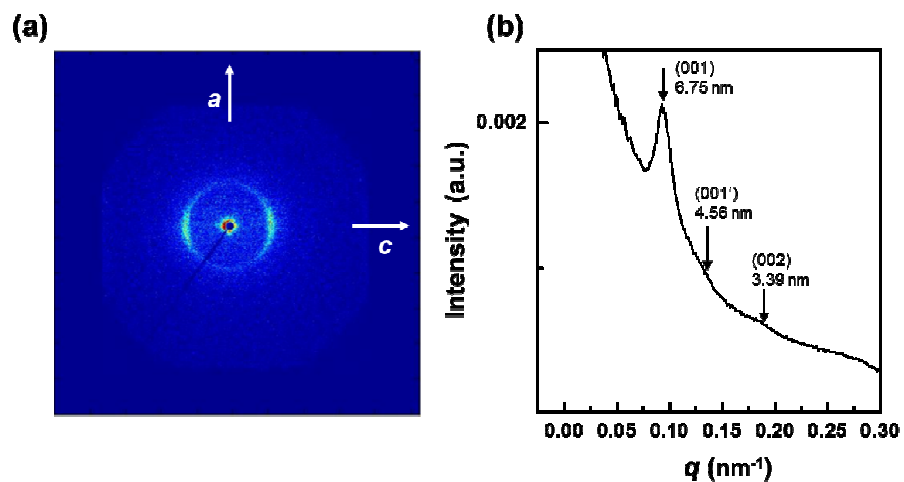

**Fig. S17** SAXD pattern of Py3M crystal at room temperature: (a) [010] zone and (b) 1D SAXD pattern.

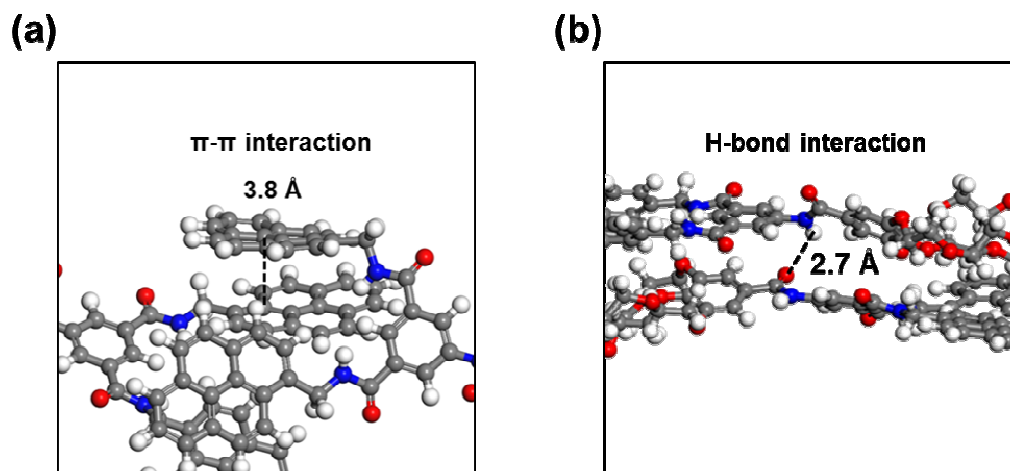

**Fig. S18** Computer simulated distance of (a)  $\pi$ - $\pi$  interaction and (b) H-bond interaction.

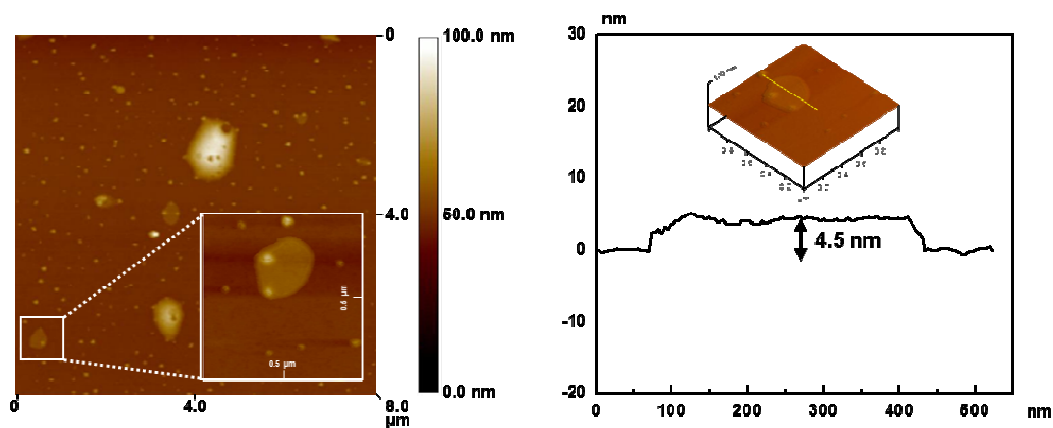

**Fig. S19** AFM image and its corresponding height profile of Py3M crystal grown on oxidized glass.

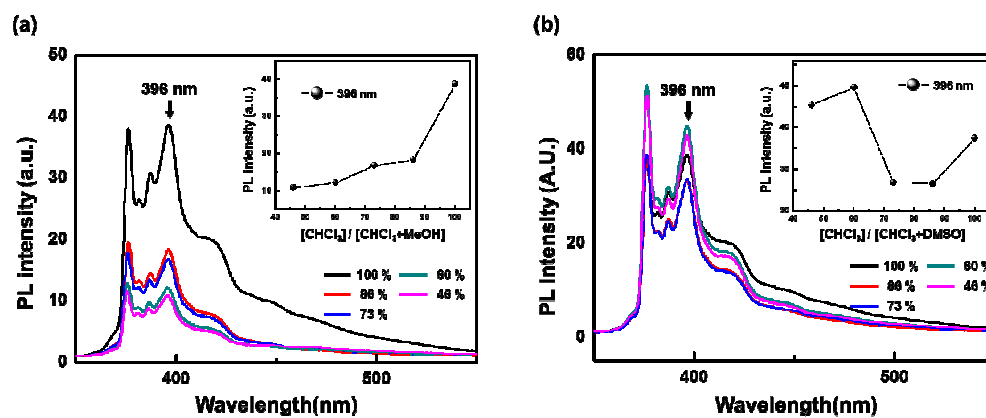

**Fig. S20** PL spectra of Py3M with different molecular volumes in (a) MeOH/CDCl<sub>3</sub> and (b) DMSO/CDCl<sub>3</sub>.
